# Supplementary material for: Mobility and association of ions in aqueous solutions: the case of imidazolium based ionic liquids
Source: Royal Society of Chemistry journal article supplement (doi:10.1039/c6cp05010g), 2016-01-01
Supplement: c6cp05010g1.pdf [file c6cp05010g1.pdf]

## Mobility and Association of Ions in Aqueous Solutions: The Case of Imidazolium Based Ionic Liquids

Marija Bešter-Rogač\*<sup>1</sup>, Marina Fedotova\*<sup>2</sup>, Sergey E. Kruchinin,<sup>2</sup> Marco Klähn\*<sup>3</sup>

*<sup>1</sup>Faculty of Chemistry and Chemical Technology, University of Ljubljana, Slovenia*

*<sup>2</sup>G.A. Krestov Institute of Solution Chemistry of the RAS, Ivanovo, Russia*

*<sup>3</sup>Institute of Chemical and Engineering Sciences, Agency for Science, Technology and Research,  
Singapore*

### Electronic Supplementary Information

\*To whom the correspondence should be addressed:

Marija Bešter-Rogač [marija.bester@fkkt.uni-lj.si](mailto:marija.bester@fkkt.uni-lj.si)

Marina V. Fedotova [hebrus@mail.ru](mailto:hebrus@mail.ru)

Marco Klähn [marco.klaehn@gmail.com](mailto:marco.klaehn@gmail.com)

### Table of contents:

|                             |           |
|-----------------------------|-----------|
| <b>A. MD simulations</b>    | <b>2</b>  |
| <b>B. RISM Calculations</b> | <b>4</b>  |
| <b>C. Experiment</b>        | <b>11</b> |

## A. MD simulations

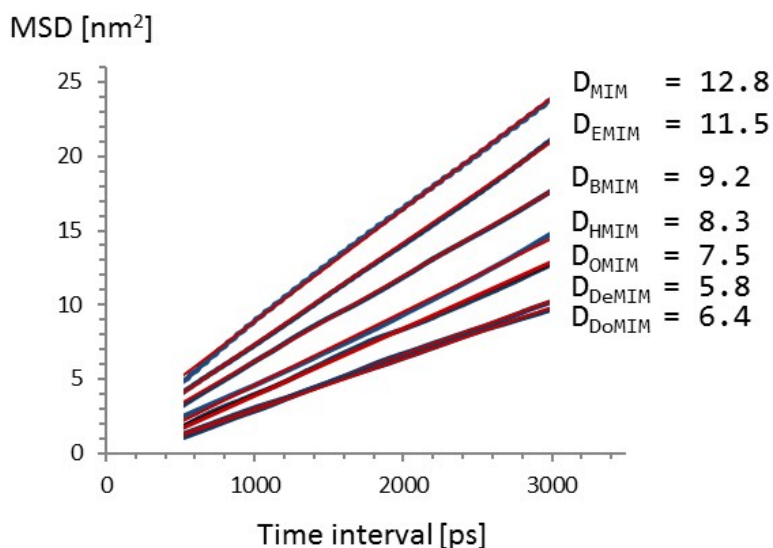

**Figure A1:** Mean square displacements of the center-of-mass of cations as a function of time interval, as derived from MD simulations. Diffusion coefficients for the different cations derived as slopes of these curves are shown on the right hand side in units of  $10^{-10} \text{ m}^2 \text{ s}^{-1}$ . The part of the curves that is shown has been used to determine the slopes. For clarity, curves were slightly shifted vertically relative to each other. The linearity of the curves can be clearly seen.

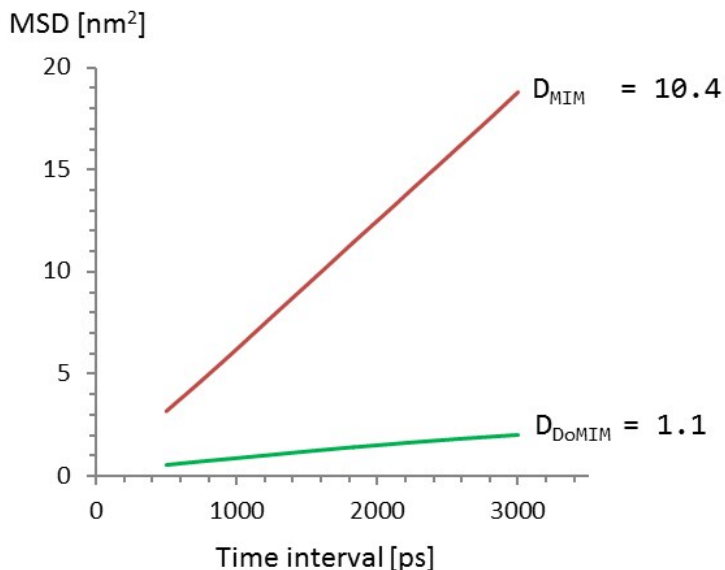

**Figure A2:** Mean square displacements of the center-of-mass of MIM cations (red) and 1,3-DoMIM cations (green), at very high concentrations (1.0 M and 1.2 M, respectively), as a function of time interval as derived from MD simulations. Diffusion coefficients were derived as slopes of these curves and are shown on the right hand side in units of  $10^{-10} \text{ m}^2 \text{ s}^{-1}$ .

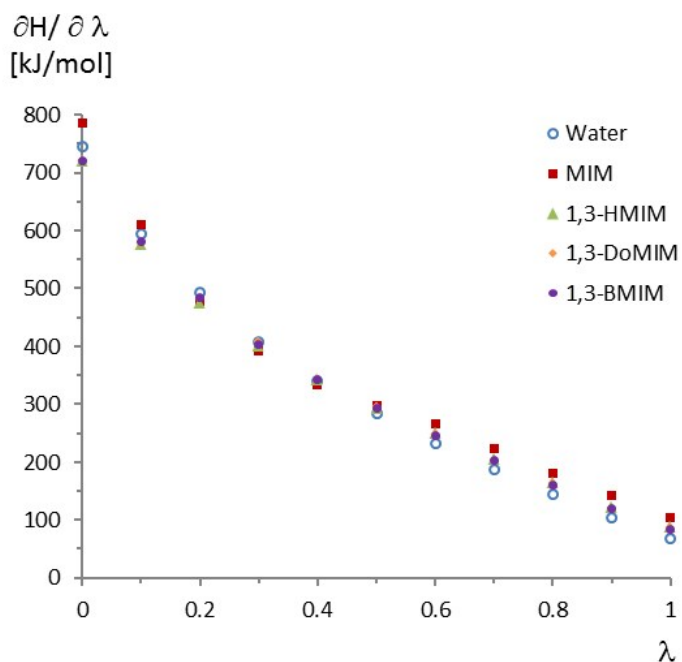

**Figure A3:** Derivate of enthalpy with respect to the interaction coupling parameter  $\lambda$ ,  $\partial H/\partial\lambda$  as a function of  $\lambda$  as derived from gradually switching off the Coulomb interactions of  $\text{Cl}^-$  when binding to MIM, 1,3-BMIM, 1,3-HMIM and 1,3-DoMIM in solution and in pure water.

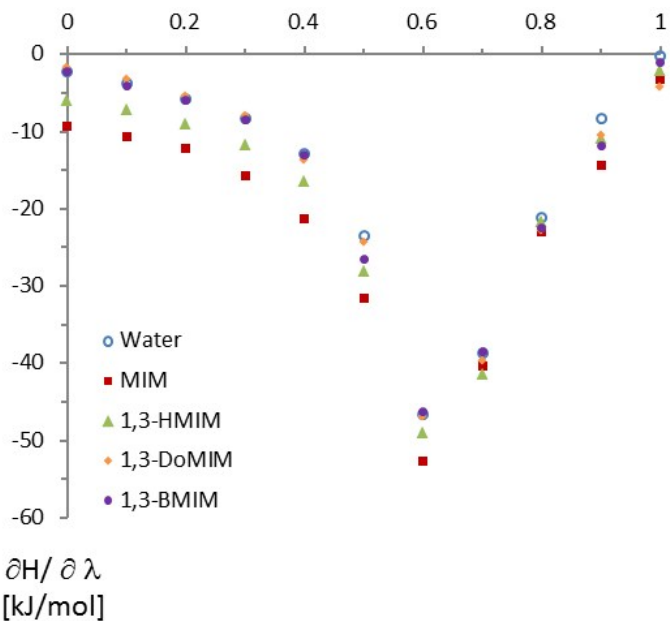

**Figure A4:** Derivate of enthalpy with respect to the interaction coupling parameter  $\lambda$ ,  $\partial H/\partial\lambda$  as a function of  $\lambda$  as derived from gradually switching off the Lennard-Jones interactions of uncharged  $\text{Cl}^-$  when binding to MIM, 1,3-BMIM, 1,3-HMIM and 1,3-DoMIM in solution and in pure water

**B. RISM Calculations**  
**Atom charges and coordinates**

**Figure B1.** [MIM]<sup>+</sup>

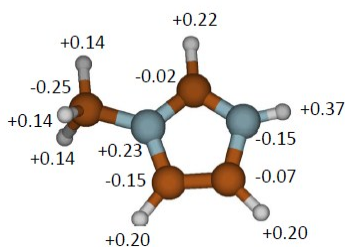

| Atom | x (Å)  | y (Å)  | z (Å)  |
|------|--------|--------|--------|
| C1   | 0.000  | 0.000  | 0.000  |
| C2   | -2.108 | 0.665  | 0.000  |
| C3   | -2.105 | -0.696 | -0.000 |
| C4   | -0.325 | 2.471  | 0.000  |
| N1   | -0.786 | 1.077  | 0.000  |
| N2   | -0.782 | -1.082 | -0.000 |
| H1   | 1.076  | -0.000 | -0.000 |
| H2   | -2.922 | 1.367  | 0.000  |
| H3   | -2.912 | -1.407 | -0.000 |
| H4   | -0.696 | 2.971  | -0.892 |
| H5   | -0.696 | 2.972  | 0.892  |
| H6   | 0.762  | 2.480  | 0.000  |
| H7   | -0.441 | -2.035 | -0.000 |

**Figure B2.** [1,2-MMIM]<sup>+</sup>

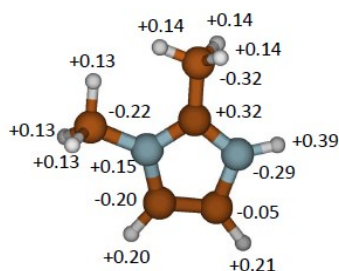

| Atom | x (Å)  | y (Å)  | z (Å)  |
|------|--------|--------|--------|
| C1   | 0.000  | 0.000  | 0.000  |
| C2   | 1.484  | 0.000  | 0.000  |
| C3   | -2.124 | -0.694 | 0.000  |
| C4   | -2.126 | 0.662  | -0.007 |
| C5   | -0.354 | 2.473  | -0.047 |
| N1   | -0.803 | 1.076  | -0.004 |
| N2   | -0.798 | -1.077 | 0.005  |
| H1   | 1.868  | 0.522  | -0.879 |
| H2   | 1.859  | -1.022 | -0.010 |
| H3   | 1.868  | 0.503  | 0.891  |
| H4   | -1.164 | 3.103  | 0.311  |
| H5   | 0.512  | 2.599  | 0.600  |
| H6   | -0.097 | 2.750  | -1.070 |
| H7   | -2.940 | 1.366  | -0.013 |
| H8   | -2.928 | -1.407 | 0.007  |
| H9   | -0.464 | -2.032 | 0.015  |

**Figure B3.** [1,3-MMIM]<sup>+</sup>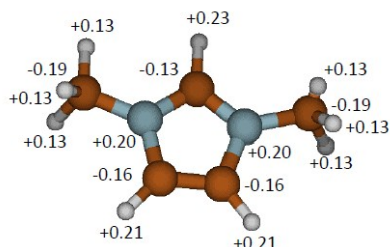

| Atom | x (Å)  | y (Å)  | z (Å)  |
|------|--------|--------|--------|
| C1   | 0.000  | 0.000  | 0.000  |
| C2   | -2.098 | 0.680  | 0.000  |
| C3   | -2.098 | -0.680 | -0.000 |
| C4   | -0.307 | 2.476  | 0.000  |
| C5   | -0.307 | -2.476 | -0.000 |
| N1   | -0.777 | 1.086  | 0.000  |
| N2   | -0.777 | -1.086 | -0.000 |
| H1   | 1.076  | -0.000 | -0.000 |
| H2   | -2.912 | 1.384  | 0.000  |
| H3   | -2.912 | -1.384 | -0.000 |
| H4   | 0.780  | 2.478  | -0.002 |
| H5   | -0.676 | 2.981  | -0.891 |
| H6   | -0.673 | 2.980  | 0.893  |
| H7   | -0.676 | -2.981 | -0.891 |
| H8   | -0.673 | -2.980 | 0.893  |
| H9   | 0.780  | -2.478 | -0.002 |

**Figure B4.** [1,3-EMIM]<sup>+</sup>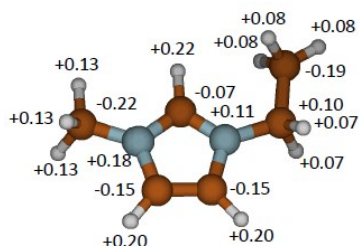

| Atom | x (Å)  | y (Å)  | z (Å)  |
|------|--------|--------|--------|
| C1   | 0.000  | 0.000  | 0.000  |
| C2   | -2.092 | 0.702  | 0.000  |
| C3   | -2.104 | -0.658 | -0.000 |
| C4   | -0.285 | 2.479  | 0.000  |
| C5   | -0.362 | -2.500 | -0.000 |
| C6   | 1.148  | -2.679 | -0.000 |
| N1   | -0.768 | 1.094  | 0.000  |
| N2   | -0.787 | -1.080 | -0.000 |
| H1   | 1.075  | 0.000  | 0.000  |
| H2   | -2.899 | 1.413  | 0.000  |
| H3   | -2.925 | -1.355 | -0.000 |
| H4   | -0.648 | 2.988  | 0.893  |
| H5   | -0.648 | 2.988  | -0.892 |
| H6   | 0.803  | 2.472  | 0.000  |
| H7   | -0.807 | -2.960 | -0.883 |
| H8   | -0.807 | -2.960 | 0.884  |
| H9   | 1.611  | -2.249 | 0.891  |
| H10  | 1.611  | -2.249 | -0.891 |
| H11  | 1.360  | -3.750 | -0.000 |

**Figure B5.** [1,3-BMIM]<sup>+</sup>

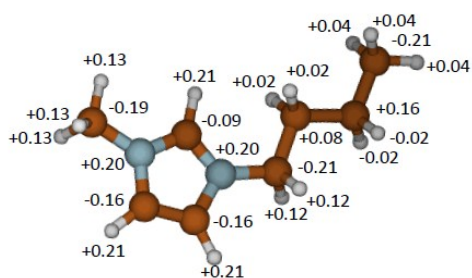

| Atom | <i>x</i> (Å) | <i>y</i> (Å) | <i>z</i> (Å) |
|------|--------------|--------------|--------------|
| C1   | 0.000        | 0.000        | 0.000        |
| C2   | -2.090       | 0.705        | 0.000        |
| C3   | -2.105       | -0.654       | 0.000        |
| C4   | -0.282       | 2.481        | 0.003        |
| C5   | -0.368       | -2.500       | -0.002       |
| C6   | 1.143        | -2.692       | 0.031        |
| C7   | 1.509        | -4.183       | 0.034        |
| C8   | 3.022        | -4.413       | 0.070        |
| N1   | -0.766       | 1.096        | -0.000       |
| N2   | -0.789       | -1.078       | 0.001        |
| H1   | 1.075        | 0.000        | 0.000        |
| H2   | -2.896       | 1.418        | 0.000        |
| H3   | -2.926       | -1.349       | 0.000        |
| H4   | -0.650       | 2.993        | -0.884       |
| H5   | -0.637       | 2.985        | 0.900        |
| H6   | 0.806        | 2.471        | -0.005       |
| H7   | -0.835       | -2.965       | 0.868        |
| H8   | -0.795       | -2.951       | -0.899       |
| H9   | 1.600        | -2.211       | -0.840       |
| H10  | 1.559        | -2.217       | 0.926        |
| H11  | 1.043        | -4.667       | 0.899        |
| H12  | 1.085        | -4.660       | -0.857       |
| H13  | 3.510        | -3.965       | -0.801       |
| H14  | 3.467        | -3.972       | 0.967        |
| H15  | 3.255        | -5.481       | 0.071        |

**Figure B6.** [1,3-HMIM]<sup>+</sup>

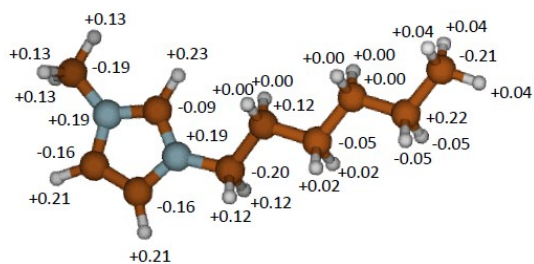

| Atom | x (Å)  | y (Å)  | z (Å)  |
|------|--------|--------|--------|
| C1   | 0.000  | 0.000  | 0.000  |
| C2   | -2.116 | 0.698  | 0.018  |
| C3   | -2.125 | -0.660 | 0.020  |
| C4   | -0.305 | 2.467  | 0.019  |
| C5   | -0.366 | -2.491 | 0.016  |
| C6   | 1.121  | -2.676 | 0.278  |
| C7   | 1.480  | -4.167 | 0.315  |
| C8   | 2.978  | -4.409 | 0.520  |
| C9   | 3.351  | -5.894 | 0.548  |
| C10  | 4.854  | -6.135 | 0.715  |
| N1   | -0.779 | 1.083  | 0.007  |
| N2   | -0.792 | -1.072 | 0.019  |
| H1   | 1.078  | 0.000  | -0.000 |
| H2   | -2.923 | 1.411  | 0.029  |
| H3   | -2.944 | -1.357 | 0.036  |
| H4   | -0.685 | 2.974  | -0.866 |
| H5   | -0.668 | 2.957  | 0.921  |
| H6   | 0.783  | 2.470  | 0.008  |
| H7   | -0.956 | -2.974 | 0.795  |
| H8   | -0.649 | -2.918 | -0.949 |
| H9   | 1.709  | -2.190 | -0.508 |
| H10  | 1.389  | -2.203 | 1.229  |
| H11  | 0.917  | -4.659 | 1.118  |
| H12  | 1.162  | -4.641 | -0.622 |
| H13  | 3.536  | -3.912 | -0.284 |
| H14  | 3.300  | -3.935 | 1.456  |
| H15  | 2.809  | -6.388 | 1.364  |
| H16  | 3.008  | -6.370 | -0.379 |
| H17  | 5.419  | -5.691 | -0.110 |
| H18  | 5.225  | -5.692 | 1.646  |
| H19  | 5.086  | -7.203 | 0.740  |

**Figure B7.** [1,3-OMIM]<sup>+</sup>

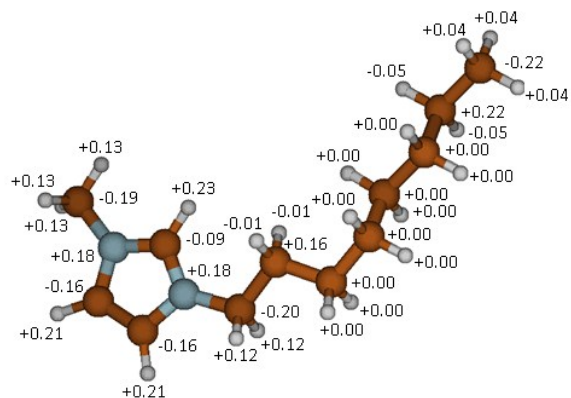

| Atom | x (Å)  | y (Å)  | z (Å)  |
|------|--------|--------|--------|
| C1   | 0.000  | 0.000  | 0.000  |
| C2   | -2.091 | 0.703  | 0.001  |
| C3   | -2.104 | -0.657 | 0.001  |
| C4   | -0.283 | 2.480  | 0.013  |
| C5   | -0.366 | -2.501 | -0.014 |
| C6   | 1.146  | -2.693 | 0.024  |
| C7   | 1.512  | -4.183 | 0.008  |
| C8   | 3.025  | -4.422 | 0.054  |
| C9   | 3.405  | -5.906 | 0.023  |
| C10  | 4.917  | -6.152 | 0.078  |
| C11  | 5.300  | -7.636 | 0.039  |
| C12  | 6.812  | -7.872 | 0.098  |
| N1   | -0.766 | 1.094  | -0.000 |
| N2   | -0.787 | -1.079 | -0.000 |
| H1   | 1.076  | -0.000 | 0.000  |
| H2   | -2.898 | 1.415  | 0.001  |
| H3   | -2.924 | -1.352 | -0.001 |
| H4   | -0.729 | 3.022  | -0.820 |
| H5   | -0.558 | 2.951  | 0.955  |
| H6   | 0.800  | 2.476  | -0.094 |
| H7   | -0.837 | -2.974 | 0.849  |
| H8   | -0.789 | -2.944 | -0.917 |
| H9   | 1.606  | -2.200 | -0.840 |
| H10  | 1.557  | -2.229 | 0.927  |
| H11  | 1.039  | -4.682 | 0.862  |
| H12  | 1.098  | -4.648 | -0.895 |
| H13  | 3.498  | -3.910 | -0.793 |
| H14  | 3.436  | -3.961 | 0.961  |
| H15  | 2.925  | -6.420 | 0.867  |
| H16  | 2.998  | -6.365 | -0.886 |
| H17  | 5.398  | -5.635 | -0.761 |
| H18  | 5.325  | -5.698 | 0.991  |
| H19  | 4.817  | -8.155 | 0.877  |
| H20  | 4.896  | -8.088 | -0.874 |
| H21  | 7.240  | -7.461 | 1.019  |
| H22  | 7.051  | -8.939 | 0.068  |
| H23  | 7.320  | -7.394 | -0.745 |



**Figure B8.** [1,3-DeMIM]<sup>+</sup>

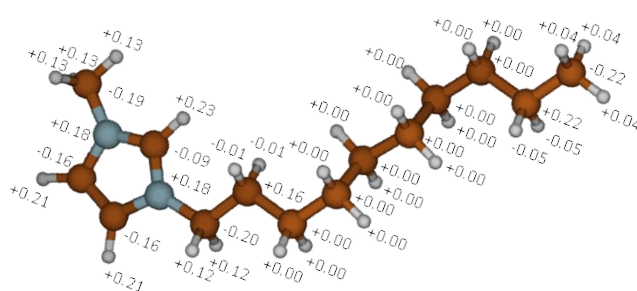

| Atom | x (Å)  | y (Å)   | z (Å)  |
|------|--------|---------|--------|
| C1   | 0.000  | 0.000   | 0.000  |
| C2   | -2.091 | 0.702   | 0.001  |
| C3   | -2.103 | -0.657  | 0.001  |
| C4   | -0.285 | 2.481   | 0.006  |
| C5   | -0.363 | -2.500  | -0.004 |
| C6   | 1.149  | -2.689  | 0.002  |
| C7   | 1.520  | -4.179  | -0.002 |
| C8   | 3.035  | -4.410  | 0.007  |
| C9   | 3.422  | -5.893  | 0.000  |
| C10  | 4.937  | -6.128  | 0.011  |
| C11  | 5.329  | -7.610  | 0.002  |
| C12  | 6.843  | -7.845  | 0.015  |
| C13  | 7.236  | -9.327  | 0.003  |
| C14  | 8.750  | -9.552  | 0.017  |
| N1   | -0.767 | 1.093   | 0.001  |
| N2   | -0.787 | -1.079  | 0.000  |
| H1   | 1.076  | -0.000  | 0.000  |
| H2   | -2.898 | 1.414   | 0.002  |
| H3   | -2.923 | -1.354  | 0.000  |
| H4   | -0.682 | 3.002   | -0.864 |
| H5   | -0.615 | 2.974   | 0.919  |
| H6   | 0.802  | 2.475   | -0.035 |
| H7   | -0.814 | -2.964  | 0.875  |
| H8   | -0.806 | -2.955  | -0.892 |
| H9   | 1.588  | -2.206  | -0.876 |
| H10  | 1.579  | -2.212  | 0.890  |
| H11  | 1.072  | -4.667  | 0.871  |
| H12  | 1.085  | -4.658  | -0.886 |
| H13  | 3.482  | -3.914  | -0.863 |
| H14  | 3.469  | -3.926  | 0.892  |
| H15  | 2.973  | -6.388  | 0.870  |
| H16  | 2.988  | -6.375  | -0.885 |
| H17  | 5.386  | -5.630  | -0.857 |
| H18  | 5.371  | -5.645  | 0.897  |
| H19  | 4.878  | -8.107  | 0.870  |
| H20  | 4.896  | -8.091  | -0.886 |
| H21  | 7.295  | -7.347  | -0.853 |
| H22  | 7.276  | -7.365  | 0.902  |
| H23  | 6.785  | -9.826  | 0.870  |
| H24  | 6.804  | -9.808  | -0.884 |
| H25  | 8.997  | -10.617 | 0.008  |
| H26  | 9.207  | -9.113  | 0.911  |
| H27  | 9.226  | -9.092  | -0.856 |

Figure B9. [1,3DoDMIM]<sup>+</sup>

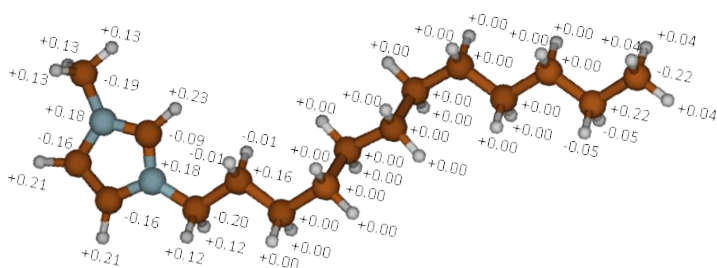

| Atom | x (Å)  | y (Å)   | z (Å)  |
|------|--------|---------|--------|
| C1   | 0.000  | 0.000   | 0.000  |
| C2   | -2.092 | 0.703   | -0.001 |
| C3   | -2.104 | -0.655  | -0.001 |
| C4   | -0.282 | 2.480   | 0.000  |
| C5   | -0.365 | -2.499  | 0.000  |
| C6   | 1.147  | -2.686  | 0.000  |
| C7   | 1.523  | -4.174  | 0.000  |
| C8   | 3.040  | -4.397  | 0.000  |
| C9   | 3.438  | -5.877  | -0.000 |
| C10  | 4.956  | -6.097  | 0.000  |
| C11  | 5.363  | -7.575  | 0.000  |
| C12  | 6.881  | -7.792  | 0.000  |
| C13  | 7.292  | -9.269  | -0.000 |
| C14  | 8.809  | -9.484  | -0.000 |
| C15  | 9.223  | -10.961 | 0.001  |
| C16  | 10.741 | -11.164 | -0.000 |
| N1   | -0.766 | 1.095   | -0.001 |
| N2   | -0.788 | -1.079  | 0.000  |
| H1   | 1.074  | 0.000   | -0.000 |
| H2   | -2.897 | 1.416   | -0.001 |
| H3   | -2.926 | -1.352  | -0.002 |
| H4   | -0.646 | 2.990   | -0.890 |
| H5   | -0.641 | 2.987   | 0.894  |
| H6   | 0.806  | 2.471   | -0.003 |
| H7   | -0.811 | -2.959  | 0.884  |
| H8   | -0.811 | -2.959  | -0.884 |
| H9   | 1.581  | -2.206  | -0.884 |
| H10  | 1.581  | -2.206  | 0.883  |
| H11  | 1.083  | -4.660  | 0.879  |
| H12  | 1.083  | -4.661  | -0.878 |
| H13  | 3.476  | -3.905  | -0.877 |
| H14  | 3.477  | -3.905  | 0.878  |
| H15  | 3.001  | -6.369  | 0.878  |
| H16  | 3.001  | -6.369  | -0.878 |
| H17  | 5.391  | -5.603  | -0.878 |
| H18  | 5.392  | -5.603  | 0.878  |
| H19  | 4.927  | -8.070  | 0.879  |
| H20  | 4.927  | -8.071  | -0.877 |
| H21  | 7.316  | -7.296  | -0.878 |
| H22  | 7.316  | -7.296  | 0.877  |
| H23  | 6.857  | -9.765  | 0.878  |
| H24  | 6.856  | -9.765  | -0.877 |
| H25  | 9.245  | -8.988  | 0.877  |
| H26  | 9.245  | -8.989  | -0.878 |
| H27  | 8.788  | -11.456 | -0.876 |
| H28  | 8.789  | -11.455 | 0.877  |
| H29  | 11.003 | -12.226 | -0.000 |
| H30  | 11.200 | -10.707 | 0.883  |
| H31  | 11.200 | -10.708 | -0.883 |

## C. Experiment

### Materials:

- 1-Methylimidazolium chloride, 98 % (IL-0094-SG-0025) Lot: J00120.1.1  
1,2-Dimethylimidazolium chloride, 98 % (IL-0277-SG-0025) Lot: J00123.1.2  
1,3-Dimethylimidazolium chloride, 98 % (CS-0399-HP-0050) Lot: K00133.1.1-CS-0399  
1-Ethyl-3-methylimidazolium chloride, >98 % (IL-0093-HP-0050) Lot: J01321.8  
1-Butyl-3-methylimidazolium chloride, 99 % (IL-0014-HP-0100) Lot: I01028.3  
1-Hexyl-3-methylimidazolium chloride, >98 % (IL-0054-HP-0050) Lot: I00225.1  
1-Octyl-3-methylimidazolium chloride, >98 % (IL-0072-HP-0025) Lot: J00233.1.1  
1-Decyl-3-methylimidazolium chloride, >98 % (IL-0065-HP-0025) Lot: K00131.1  
1-Dodecyl-3-methylimidazolium chloride, >98 % (IL-0120-HP-0025) Lot: K00141.1

**Table C1.** Densities, viscosities and dielectric constants of pure water and limiting ionic conductances of Cl<sup>-</sup> in water.<sup>a</sup> In Supporting Material

| $T$    | $d_0^b$  | $\eta \cdot 10^3^c$ | $\epsilon^d$ | $\lambda^\infty(\text{Cl}^-)^e$ |
|--------|----------|---------------------|--------------|---------------------------------|
| 278.15 | 0.999967 | 1.5192              | 85.897       | 47.50                           |
| 283.15 | 0.999702 | 1.3069              | 83.945       | 54.33                           |
| 288.15 | 0.999102 | 1.1382              | 82.039       | 61.42                           |
| 293.15 | 0.998206 | 1.0020              | 80.176       | 68.77                           |
| 298.15 | 0.997048 | 0.8903              | 78.358       | 76.35                           |
| 303.15 | 0.995651 | 0.7975              | 76.581       | 84.17                           |
| 308.15 | 0.994036 | 0.7195              | 74.846       | 92.20                           |
| 313.15 | 0.992219 | 0.6530              | 73.157       | 100.46                          |

<sup>a</sup>Units:  $T$ , K;  $d_0$ , kg·dm<sup>-3</sup>;  $\eta$ , Pa·s;  $\lambda^\infty$ , S·cm<sup>2</sup>·mol<sup>-1</sup>

<sup>b</sup>Ref.1; <sup>c</sup>Ref.2; <sup>d</sup>Ref.3; <sup>e</sup>Ref.4

**Table C2.** Molar conductivities,  $\Lambda$ , of investigated systems in aqueous solutions, together with density coefficient  $b$  and molar mass of solute,  $M_2$ .<sup>a</sup>

|                                                                           | $T$    |        |        |         |         |         |         |         |
|---------------------------------------------------------------------------|--------|--------|--------|---------|---------|---------|---------|---------|
| $m \cdot 10^3$                                                            | 278.15 | 283.15 | 288.15 | 293.15  | 298.15  | 303.15  | 308.15  | 313.15  |
| <b>[MIM][Cl], <math>b = 0.0237</math>, <math>M_2 = 117.59</math></b>      |        |        |        |         |         |         |         |         |
| 0.18954                                                                   | 75.240 | 86.648 |        |         |         |         |         |         |
| 0.44403                                                                   | 74.774 | 86.062 |        |         |         |         |         |         |
| 0.70033                                                                   | 74.512 | 85.522 | 97.091 | 109.164 | 121.750 | 134.759 | 147.845 | 160.925 |
| 0.98194                                                                   | 74.192 | 85.130 | 96.608 | 108.622 | 121.083 | 134.011 | 147.313 | 160.517 |
| 1.29376                                                                   | 73.887 | 84.723 | 96.166 | 108.107 | 120.478 | 133.274 | 146.352 | 159.057 |
| 1.63866                                                                   | 73.692 | 84.498 | 95.815 | 107.677 | 119.955 | 132.588 | 145.291 | 158.107 |
| 2.03783                                                                   | 73.437 | 84.096 | 95.372 | 107.166 | 119.379 | 131.984 | 144.744 | 157.495 |
| 2.58313                                                                   | 73.065 | 83.743 | 94.931 | 106.651 | 118.771 | 131.315 | 144.157 | 157.087 |
| 3.2472                                                                    | 72.732 | 83.354 | 94.451 | 106.090 | 118.141 | 130.584 | 143.372 | 156.219 |
| 4.10998                                                                   | 72.371 | 82.908 | 93.936 | 105.498 | 117.449 | 129.778 | 142.214 | 154.712 |
| 5.17933                                                                   | 71.970 | 82.431 | 93.343 | 104.801 | 116.680 | 128.912 | 141.422 | 153.757 |
| <b>[1,2-MMIM][Cl], <math>b = 0.0193</math>, <math>M_2 = 132.59</math></b> |        |        |        |         |         |         |         |         |
| 0.28945                                                                   | 73.125 | 83.757 | 94.889 | 106.500 | 118.498 | 130.840 | 143.466 | 156.362 |
| 0.55158                                                                   | 72.801 | 83.388 | 94.473 | 106.016 | 117.965 | 130.292 | 142.827 | 155.738 |
| 0.85275                                                                   | 72.517 | 83.062 | 94.012 | 105.487 | 117.402 | 129.639 | 142.188 | 155.185 |
| 1.21579                                                                   | 72.076 | 82.574 | 93.604 | 105.046 | 116.875 | 129.024 | 141.497 | 154.499 |
| 1.65136                                                                   | 71.866 | 82.303 | 93.213 | 104.590 | 116.363 | 128.442 | 140.936 | 153.743 |
| 2.1016                                                                    | 71.625 | 82.017 | 92.883 | 104.231 | 115.781 | 127.866 | 140.204 | 153.032 |
| 2.68498                                                                   | 71.323 | 81.664 | 92.326 | 103.615 | 115.305 | 127.320 | 139.591 | 152.396 |
| 3.33628                                                                   | 70.883 | 81.170 | 91.930 | 103.172 | 114.819 | 126.771 | 139.037 | 151.697 |
| 3.99769                                                                   | 70.594 | 80.897 | 91.625 | 102.808 | 114.409 | 126.350 | 138.677 | 151.167 |
| 4.70898                                                                   | 70.452 | 80.656 | 91.334 | 102.477 | 113.990 | 125.800 | 138.059 | 150.747 |
| 5.51431                                                                   | 70.164 | 80.345 | 91.005 | 102.097 | 113.581 | 125.419 | 137.581 | 150.071 |

**Table C2.** Continued.<sup>a</sup>

|                                                                           | <i>T</i> |        |        |         |         |         |         |         |
|---------------------------------------------------------------------------|----------|--------|--------|---------|---------|---------|---------|---------|
| $m \cdot 10^3$                                                            | 278.15   | 283.15 | 288.15 | 293.15  | 298.15  | 303.15  | 308.15  | 313-15  |
| <b>[1,3-MMIM][Cl], <math>b = 0.0191</math>, <math>M_2 = 132.59</math></b> |          |        |        |         |         |         |         |         |
| 0.45474                                                                   |          |        | 93.544 | 105.220 | 117.283 | 129.698 | 142.432 | 153.683 |
| 0.80708                                                                   | 71.383   | 82.237 | 93.226 | 104.761 | 116.701 | 128.974 | 141.381 | 153.516 |
| 1.16674                                                                   | 71.205   | 81.884 | 92.910 | 104.381 | 116.227 | 128.445 | 140.904 | 153.037 |
| 1.53916                                                                   | 71.164   | 81.634 | 92.638 | 104.004 | 115.858 | 128.040 | 140.743 | 152.490 |
| 1.92318                                                                   | 70.898   | 81.511 | 92.410 | 103.728 | 115.448 | 127.550 | 139.896 | 151.764 |
| 2.43647                                                                   | 70.639   | 81.255 | 92.109 | 103.395 | 115.063 | 127.033 | 139.497 | 151.422 |
| 3.10436                                                                   | 70.427   | 80.953 | 91.744 | 102.958 | 114.562 | 126.555 | 138.871 | 150.344 |
| 3.78026                                                                   | 70.167   | 80.665 | 91.394 | 102.543 | 114.111 | 126.029 | 138.208 | 149.657 |
| 4.62378                                                                   | 69.828   | 80.316 | 91.011 | 102.115 | 113.598 | 125.468 | 137.574 | 149.321 |
| 5.60443                                                                   | 71.383   | 79.965 | 90.592 | 101.635 | 113.052 | 124.731 | 137.042 | 153.683 |
| <b>[1,3-EMIM][Cl], <math>b = 0.0163</math>, <math>M_2 = 146.62</math></b> |          |        |        |         |         |         |         |         |
| 0.22563                                                                   | 69.997   | 80.278 | 91.032 | 102.257 | 113.774 | 125.783 | 138.156 | 150.687 |
| 0.49068                                                                   | 69.472   | 79.681 | 90.394 | 101.522 | 113.090 | 124.998 | 137.291 | 149.904 |
| 0.81714                                                                   | 69.276   | 79.464 | 90.110 | 101.116 | 112.640 | 124.498 | 136.738 | 149.336 |
| 1.16889                                                                   | 68.872   | 78.981 | 89.654 | 100.679 | 112.098 | 123.920 | 136.048 | 148.542 |
| 1.50939                                                                   | 68.594   | 78.658 | 89.205 | 100.204 | 111.607 | 123.364 | 135.471 | 147.932 |
| 1.89394                                                                   | 68.381   | 78.405 | 88.922 | 99.873  | 111.221 | 122.919 | 134.705 | 147.148 |
| 2.35567                                                                   | 68.087   | 78.075 | 88.540 | 99.213  | 110.564 | 122.224 | 134.224 | 146.682 |
| 2.78975                                                                   | 67.920   | 77.870 | 88.144 | 99.034  | 110.282 | 121.878 | 133.849 | 146.266 |
| 3.285                                                                     | 67.715   | 77.577 | 87.923 | 98.785  | 109.990 | 121.560 | 133.421 | 145.629 |
| 3.70504                                                                   | 67.354   | 77.254 | 87.641 | 98.429  | 109.655 | 121.223 | 133.058 | 145.238 |
| 4.3113                                                                    | 67.128   | 77.013 | 87.330 | 98.096  | 109.259 | 120.802 | 132.656 | 144.697 |
| 5.09781                                                                   | 66.920   | 76.741 | 87.020 | 97.739  | 108.853 | 120.318 | 132.064 | 144.167 |

**Table C2.** Continued.<sup>a</sup>

|                                                                         | <i>T</i>      |               |               |               |               |               |               |               |
|-------------------------------------------------------------------------|---------------|---------------|---------------|---------------|---------------|---------------|---------------|---------------|
| <i>m</i> · 10 <sup>3</sup>                                              | <b>278.15</b> | <b>283.15</b> | <b>288.15</b> | <b>293.15</b> | <b>298.15</b> | <b>303.15</b> | <b>308.15</b> | <b>313-15</b> |
| <b>[1,3-BMIM][Cl], <i>b</i> = 0.0128, <i>M</i><sub>2</sub> = 174.67</b> |               |               |               |               |               |               |               |               |
| 0.21756                                                                 | 65.982        | 75.769        | 86.049        | 96.821        | 107.769       | 119.349       | 131.274       | 143.606       |
| 0.42633                                                                 | 65.591        | 75.368        | 85.593        | 96.316        | 107.444       | 118.950       | 130.838       | 143.042       |
| 0.6929                                                                  | 65.799        | 75.505        | 85.738        | 96.408        | 107.224       | 118.652       | 130.448       | 142.633       |
| 1.00327                                                                 | 65.336        | 74.805        | 84.994        | 95.579        | 106.611       | 117.938       | 129.608       | 141.668       |
| 1.34087                                                                 | 64.761        | 74.389        | 84.511        | 95.057        | 106.039       | 117.301       | 128.967       | 140.906       |
| 1.63702                                                                 | 64.575        | 74.150        | 84.203        | 94.742        | 105.628       | 116.885       | 128.451       | 140.351       |
| 1.96337                                                                 | 64.296        | 73.849        | 83.852        | 94.327        | 105.193       | 116.374       | 127.553       | 139.502       |
| 2.33837                                                                 | 64.079        | 73.584        | 83.570        | 94.006        | 104.565       | 115.690       | 127.160       | 139.085       |
| 2.66458                                                                 | 63.915        | 73.417        | 83.349        | 93.508        | 104.273       | 115.396       | 126.884       | 138.649       |
| 3.0159                                                                  | 63.717        | 73.189        | 82.933        | 93.288        | 104.008       | 115.128       | 126.553       | 138.331       |
| 3.49489                                                                 | 63.503        | 72.748        | 82.635        | 92.967        | 103.688       | 114.752       | 126.137       | 137.806       |
| 4.25795                                                                 | 63.109        | 72.460        | 82.286        | 92.535        | 103.183       | 114.209       | 125.558       | 137.206       |
| <b>[1,3-HMIM][Cl], <i>b</i> = 0.103, <i>M</i><sub>2</sub> = 202.72</b>  |               |               |               |               |               |               |               |               |
| 0.234                                                                   | 63.493        | 73.007        | 82.967        | 93.390        | 104.000       | 115.192       | 126.664       | 138.509       |
| 0.52502                                                                 | 63.010        | 72.452        | 82.288        | 92.631        | 103.330       | 114.401       | 125.727       | 137.512       |
| 0.80732                                                                 | 62.737        | 72.099        | 81.932        | 91.802        | 102.452       | 113.477       | 124.744       | 136.392       |
| 1.13903                                                                 | 62.468        | 71.528        | 81.292        | 91.521        | 102.111       | 113.059       | 124.325       | 135.930       |
| 1.43416                                                                 | 62.037        | 71.333        | 81.079        | 91.262        | 101.827       | 112.685       | 123.929       | 135.397       |
| 1.7634                                                                  | 61.997        | 71.236        | 80.950        | 91.100        | 101.626       | 112.498       | 123.677       | 134.749       |
| 2.10914                                                                 | 61.823        | 71.052        | 80.717        | 90.854        | 101.358       | 111.753       | 122.896       | 134.397       |
| 2.48689                                                                 | 61.675        | 70.873        | 80.513        | 90.614        | 100.695       | 111.549       | 122.644       | 133.974       |
| 2.8585                                                                  | 61.523        | 70.697        | 80.309        | 90.063        | 100.445       | 111.245       | 122.320       | 133.795       |
| 3.39628                                                                 | 61.271        | 70.119        | 79.725        | 89.742        | 100.137       | 110.890       | 121.920       | 133.240       |
| 3.92066                                                                 | 60.832        | 69.953        | 79.489        | 89.500        | 99.872        | 110.567       | 121.522       | 132.845       |
| 4.50967                                                                 | 60.798        | 69.867        | 79.433        | 89.394        | 99.740        | 110.441       | 121.352       | 132.621       |

**Table C2.** Continued.<sup>a</sup>

|                                                               | <i>T</i>      |               |               |               |               |               |               |               |
|---------------------------------------------------------------|---------------|---------------|---------------|---------------|---------------|---------------|---------------|---------------|
| $m \cdot 10^3$                                                | <b>278.15</b> | <b>283.15</b> | <b>288.15</b> | <b>293.15</b> | <b>298.15</b> | <b>303.15</b> | <b>308.15</b> | <b>313.15</b> |
| <b>[1,3-OMIM][Cl], <math>b = 0.0063, M_2 = 230.78</math></b>  |               |               |               |               |               |               |               |               |
| 0.19748                                                       | 62.065        | 71.343        | 81.087        | 91.274        | 101.852       | 112.782       | 123.863       | 135.349       |
| 0.37867                                                       | 61.709        | 70.917        | 80.565        | 90.723        | 101.241       | 112.078       | 123.231       | 134.523       |
| 0.56877                                                       | 61.396        | 70.571        | 80.186        | 90.262        | 100.701       | 111.501       | 122.540       | 133.614       |
| 0.76991                                                       | 61.188        | 70.352        | 79.926        | 89.958        | 99.927        | 110.680       | 121.686       | 133.087       |
| 0.98513                                                       | 61.117        | 70.214        | 79.539        | 89.530        | 99.897        | 110.610       | 121.604       | 132.910       |
| 1.31508                                                       | 60.669        | 69.727        | 79.247        | 89.222        | 99.560        | 110.225       | 121.106       | 132.505       |
| 1.62773                                                       | 60.476        | 69.537        | 79.007        | 88.924        | 99.207        | 109.798       | 120.708       | 131.867       |
| 1.96676                                                       | 60.193        | 69.171        | 78.668        | 88.541        | 98.795        | 109.398       | 119.579       | 130.815       |
| 2.25946                                                       | 60.038        | 69.024        | 78.451        | 88.280        | 98.515        | 108.484       | 119.401       | 130.456       |
| 2.57309                                                       | 59.950        | 68.917        | 78.321        | 88.157        | 98.015        | 108.536       | 119.414       | 130.553       |
| 2.92974                                                       | 59.798        | 68.743        | 78.126        | 87.552        | 97.717        | 108.219       | 119.057       | 130.056       |
| 3.29771                                                       | 59.681        | 68.587        | 77.555        | 87.356        | 97.589        | 108.094       | 118.893       | 129.956       |
| 3.66377                                                       | 59.557        | 68.173        | 77.499        | 87.231        | 97.387        | 107.931       | 118.652       | 129.748       |
| 4.03165                                                       | 59.257        | 68.080        | 77.364        | 87.109        | 97.266        | 107.730       | 118.444       | 129.438       |
| 4.54382                                                       | 59.012        | 67.839        | 77.100        | 86.855        | 96.952        | 107.372       | 118.106       | 129.158       |
| <b>[1,3-DeMIM][Cl], <math>b = 0.0056, M_2 = 258.84</math></b> |               |               |               |               |               |               |               |               |
| 0.18277                                                       | 60.832        | 69.921        | 79.480        | 89.481        | 99.872        | 110.684       | 121.809       | 132.769       |
| 0.3737                                                        | 60.636        | 69.435        | 78.882        | 88.841        | 99.149        | 109.887       | 120.839       | 132.089       |
| 0.55475                                                       | 60.265        | 69.273        | 78.709        | 88.613        | 98.951        | 109.510       | 120.279       | 131.259       |
| 0.77803                                                       | 60.056        | 69.018        | 78.415        | 88.265        | 97.980        | 108.599       | 119.476       | 130.560       |
| 0.98709                                                       | 59.913        | 68.852        | 77.933        | 87.748        | 97.935        | 108.410       | 118.961       | 129.775       |
| 1.24515                                                       | 59.570        | 68.449        | 77.755        | 87.532        | 97.703        | 108.187       | 118.932       | 129.816       |
| 1.54371                                                       | 59.314        | 68.160        | 77.542        | 87.239        | 97.351        | 107.774       | 118.133       | 128.887       |
| 1.82386                                                       | 59.184        | 68.000        | 77.284        | 86.988        | 97.070        | 107.502       | 118.109       | 128.667       |
| 2.14145                                                       | 59.044        | 67.845        | 77.083        | 86.855        | 96.826        | 107.213       | 117.256       | 127.889       |
| 2.54195                                                       | 58.835        | 67.613        | 76.821        | 86.544        | 96.209        | 106.657       | 117.105       | 127.644       |
| 2.93474                                                       | 58.699        | 67.441        | 76.663        | 85.975        | 95.915        | 106.285       | 116.819       | 127.186       |
| 3.40294                                                       | 58.548        | 67.297        | 76.151        | 85.726        | 95.693        | 106.036       | 116.664       | 127.619       |
| 3.9266                                                        | 58.354        | 66.782        | 75.911        | 85.474        | 95.405        | 105.692       | 116.247       | 126.856       |
| 4.47114                                                       | 57.967        | 66.628        | 75.709        | 85.425        | 95.159        | 105.398       | 115.955       | 126.775       |

**Table C2.** Continued.<sup>a</sup>

|                                                                         | <i>T</i>      |               |               |               |               |               |               |               |
|-------------------------------------------------------------------------|---------------|---------------|---------------|---------------|---------------|---------------|---------------|---------------|
| <i>m</i> · 10 <sup>3</sup>                                              | <b>278.15</b> | <b>283.15</b> | <b>288.15</b> | <b>293.15</b> | <b>298.15</b> | <b>303.15</b> | <b>308.15</b> | <b>313-15</b> |
| <b>[1,3-DoMIM][Cl], <i>b</i> = 0.034, <i>M</i><sub>2</sub> = 286.88</b> |               |               |               |               |               |               |               |               |
| 0.19427                                                                 | 60.405        | 69.429        | 78.922        | 88.834        | 99.141        | 109.817       | 120.554       | 131.868       |
| 0.42567                                                                 | 59.821        | 68.759        | 78.174        | 88.016        | 98.228        | 108.806       | 119.725       | 130.904       |
| 0.64488                                                                 | 59.695        | 68.619        | 77.980        | 87.778        | 97.958        | 108.500       | 119.027       | 130.166       |
| 0.88716                                                                 | 59.396        | 68.257        | 77.556        | 87.023        | 97.148        | 107.650       | 118.491       | 129.649       |
| 1.16833                                                                 | 59.081        | 67.659        | 76.879        | 86.580        | 96.649        | 107.112       | 117.950       | 129.024       |
| 1.42864                                                                 | 58.684        | 67.444        | 76.664        | 86.295        | 96.316        | 106.692       | 117.464       | 128.513       |
| 1.73399                                                                 | 58.446        | 67.193        | 76.388        | 86.011        | 96.012        | 106.360       | 117.056       | 127.968       |
| 2.08744                                                                 | 58.296        | 66.993        | 76.127        | 85.680        | 95.661        | 105.959       | 116.226       | 127.271       |
| 2.58249                                                                 | 58.013        | 66.660        | 75.740        | 85.287        | 94.770        | 105.061       | 115.688       | 126.682       |
| 3.23238                                                                 | 57.707        | 66.321        | 75.043        | 84.531        | 94.421        | 104.614       | 115.143       | 125.892       |
| 3.84412                                                                 | 57.470        | 65.819        | 74.809        | 84.278        | 94.101        | 104.315       | 114.877       | 125.607       |
| 4.47532                                                                 | 57.188        | 65.740        | 74.700        | 84.123        | 93.904        | 104.032       | 114.353       | 125.136       |
| 5.20929                                                                 | 56.827        | 65.377        | 74.294        | 83.730        | 93.506        | 103.557       | 113.843       | 124.562       |

<sup>a</sup>Units: *T*, K; *m*, mol·kg<sup>-1</sup>; *A*, S·cm<sup>2</sup>·mol<sup>-1</sup>; *b*, kg<sup>2</sup>·dm<sup>-3</sup>·mol<sup>-1</sup>, *M*<sub>2</sub>, g·mol<sup>-1</sup>



**Table C3.** Limiting Molar Conductivities,  $\Lambda^\infty$ , and Association Constants,  $K_A$ , for the Parameter  $R = 0.786$  nm for Solutions of Imidazolium ILs in water.<sup>a</sup>

| <b>T</b>      | $\Lambda^\infty$      | $K_A$           | $\Lambda^\infty$                | $K_A$                      | $\Lambda^\infty$      | $K_A$           |
|---------------|-----------------------|-----------------|---------------------------------|----------------------------|-----------------------|-----------------|
|               | <b>[MIM][Cl]</b>      |                 | <b>[1,2-MMIM][Cl]</b>           |                            | <b>[1,3-MMIM][Cl]</b> |                 |
| <b>278.15</b> | $75.90 \pm 0.02$      | $3.19 \pm 0.15$ | $73.99 \pm 0.03$                | $2.61 \pm 0.20$            | $73.06 \pm 0.05$      | $0.32 \pm 0.25$ |
| <b>283.15</b> | $87.26 \pm 0.08$      | $4.24 \pm 0.43$ | $84.77 \pm 0.03$                | $2.58 \pm 0.17$            | $83.84 \pm 0.04$      | $0.73 \pm 0.18$ |
| <b>288.15</b> | $98.89 \pm 0.06$      | $4.10 \pm 0.27$ | $96.03 \pm 0.04$                | $2.58 \pm 0.17$            | $95.08 \pm 0.04$      | $0.80 \pm 0.19$ |
| <b>293.15</b> | $111.24 \pm 0.07$     | $4.46 \pm 0.29$ | $107.79 \pm 0.04$               | $2.55 \pm 0.16$            | $106.89 \pm 0.02$     | $1.22 \pm 0.10$ |
| <b>298.15</b> | $124.06 \pm 0.10$     | $4.87 \pm 0.37$ | $119.94 \pm 0.05$               | $2.49 \pm 0.16$            | $119.13 \pm 0.01$     | $1.60 \pm 0.05$ |
| <b>303.15</b> | $137.34 \pm 0.14$     | $5.32 \pm 0.45$ | $132.46 \pm 0.05$               | $2.45 \pm 0.16$            | $131.74 \pm 0.03$     | $1.93 \pm 0.09$ |
| <b>308.15</b> | $150.81 \pm 0.20$     | $5.57 \pm 0.61$ | $145.26 \pm 0.06$               | $2.20 \pm 0.18$            | $144.60 \pm 0.09$     | $1.84 \pm 0.25$ |
| <b>313.15</b> | $164.24 \pm 0.26$     | $5.66 \pm 0.71$ | $158.48 \pm 0.06$               | $2.03 \pm 0.16$            | $157.32 \pm 0.17$     | $1.46 \pm 0.42$ |
|               | <b>[1,3-EMIM][Cl]</b> |                 | <b>[1,3-BMIM][Cl]</b>           |                            | <b>[1,3-HMIM][Cl]</b> |                 |
| <b>278.15</b> | $70.70 \pm 0.04$      | $3.28 \pm 0.22$ | $66.87 \pm 0.08$<br>$66.54^b$   | $4.99 \pm 0.69$<br>$7.2^b$ | $64.16 \pm 0.05$      | $3.16 \pm 0.42$ |
| <b>283.15</b> | $81.09 \pm 0.04$      | $3.23 \pm 0.20$ | $76.78 \pm 0.08$<br>$76.41^b$   | $4.96 \pm 0.55$<br>$6.9^b$ | $73.73 \pm 0.08$      | $3.27 \pm 0.51$ |
| <b>288.15</b> | $92.00 \pm 0.04$      | $3.28 \pm 0.20$ | $87.23 \pm 0.09$<br>$86.74^b$   | $5.08 \pm 0.55$<br>$6.7^b$ | $83.78 \pm 0.08$      | $3.07 \pm 0.48$ |
| <b>293.15</b> | $103.31 \pm 0.06$     | $3.12 \pm 0.26$ | $98.14 \pm 0.09$<br>$97.48^b$   | $5.19 \pm 0.53$<br>$6.4^b$ | $94.23 \pm 0.10$      | $2.82 \pm 0.55$ |
| <b>298.15</b> | $115.05 \pm 0.05$     | $2.95 \pm 0.20$ | $109.34 \pm 0.09$<br>$108.64^b$ | $4.79 \pm 0.48$<br>$6.2^b$ | $105.07 \pm 0.10$     | $2.61 \pm 0.48$ |
| <b>303.15</b> | $127.92 \pm 0.06$     | $2.86 \pm 0.20$ | $121.04 \pm 0.10$<br>$120.11^b$ | $4.76 \pm 0.44$<br>$5.6^b$ | $116.33 \pm 0.12$     | $2.56 \pm 0.50$ |
| <b>308.15</b> | $139.69 \pm 0.07$     | $2.90 \pm 0.24$ | $133.08 \pm 0.13$<br>$131.92^b$ | $4.83 \pm 0.51$<br>$5.1^b$ | $127.93 \pm 0.12$     | $2.57 \pm 0.46$ |
| <b>313.15</b> | $152.55 \pm 0.06$     | $2.87 \pm 0.18$ | $145.54 \pm 0.12$<br>$143.93^b$ | $4.97 \pm 0.45$<br>$4.5^b$ | $139.86 \pm 0.14$     | $2.58 \pm 0.51$ |

**Table C3.** Continued.<sup>a</sup>

| <b>T</b>      | $\Lambda^\infty$      | $K_A$       | $\Lambda^\infty$       | $K_A$       | $\Lambda^\infty$       | $K_A$       |
|---------------|-----------------------|-------------|------------------------|-------------|------------------------|-------------|
|               | <b>[1,3-OMIM][Cl]</b> |             | <b>[1,3-DeMIM][Cl]</b> |             | <b>[1,3-DoMIM][Cl]</b> |             |
| <b>278.15</b> | 62.65 ± 0.05          | 4.12 ± 0.33 | 61.45 ± 0.04           | 3.63 ± 0.38 | 60.91 ± 0.06           | 5.47 ± 0.48 |
| <b>283.15</b> | 72.04 ± 0.04          | 4.33 ± 0.29 | 70.61 ± 0.04           | 3.65 ± 0.32 | 69.99 ± 0.08           | 5.38 ± 0.56 |
| <b>288.15</b> | 81.84 ± 0.05          | 4.29 ± 0.52 | 80.22 ± 0.05           | 3.64 ± 0.31 | 79.57 ± 0.10           | 5.56 ± 0.62 |
| <b>293.15</b> | 92.13 ± 0.06          | 4.28 ± 0.35 | 90.31 ± 0.07           | 3.46 ± 0.39 | 89.52 ± 0.11           | 5.07 ± 0.61 |
| <b>298.15</b> | 102.71 ± 0.09         | 3.80 ± 0.47 | 100.73 ± 0.09          | 3.49 ± 0.47 | 99.90 ± 0.14           | 4.94 ± 0.68 |
| <b>303.15</b> | 113.70 ± 0.14         | 3.64 ± 0.60 | 111.59 ± 0.09          | 3.35 ± 0.44 | 110.70 ± 0.15          | 4.83 ± 0.63 |
| <b>308.15</b> | 124.93 ± 0.15         | 3.27 ± 0.63 | 122.60 ± 0.16          | 3.17 ± 0.69 | 121.72 ± 0.12          | 4.56 ± 0.49 |
| <b>313.15</b> | 136.48 ± 0.16         | 2.90 ± 0.58 | 133.78 ± 0.22          | 2.92 ± 0.86 | 133.15 ± 0.12          | 4.40 ± 0.44 |

<sup>a</sup>Units:  $T$ , K;  $\Lambda^\infty$ , S·cm<sup>2</sup>·mol<sup>-1</sup>;  $K_A$ , dm<sup>3</sup>·mol<sup>-1</sup>

<sup>b</sup> from ref.<sup>5</sup>

## References

- 1 E.F.G. Herington, *Pure Appl. Chem.*, 1976, **45**, 1-9.
- 2 L. Korson, W. Drost-Hansen, F.J. Millero, *J. Phys. Chem.*, 1969, **73**, 34-39.
- 3 B.B. Owen, R.C. Miller, C.E. Miller, H.L. Cogan, *J. Phys. Chem.*, 1961, **65**, 2065-2070.
- 4 H. S. Harned and B. B. Owen, *The Physical Chemistry of Electrolytic Solution*, Reinhold, New York, 1958, p. 233.
- 5 Bešter-Rogač M., Stoppa A., Hunger J., Hefter G., Buchner R. *Phys. Chem. Chem. Phys.* 2011, **13**, 17588-17598.
